# Supplementary material
Source: MDPI journal article supplement (https://www.mdpi.com/2673-687X/2/3/11)
Supplement: s1 [file s1]

# Advanced Fabrication of miRNA-Based Electrochemical Nanobiosensor for Diagnosis of Breast Cancer

Cansu İlke Kuru <sup>1,2,\*</sup> and Sinan Akgöl <sup>2</sup>

<sup>1</sup> Biotechnology Department, Graduate School of Applied and Natural Sciences, Ege University, Izmir 35100, Turkey

<sup>2</sup> Department of Biochemistry, Faculty of Science, Ege University, Izmir 35100, Turkey

\* Correspondence: cansuilke89@gmail.com

## Supplementary Materials

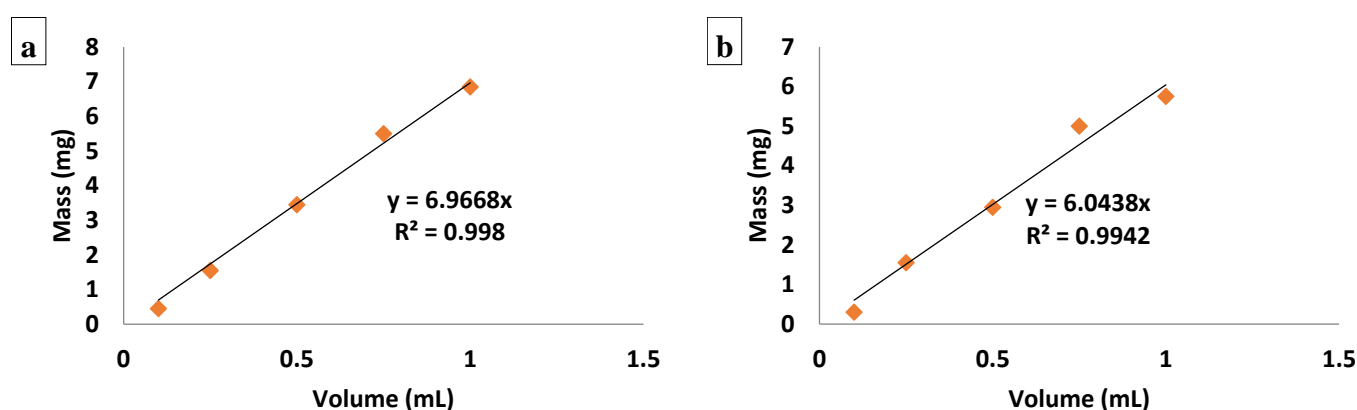

Supplementary Figure S1. Dry-mass graph of a) p(HEMA) and b) Cys-graft-p(HEMA) nanopolymer

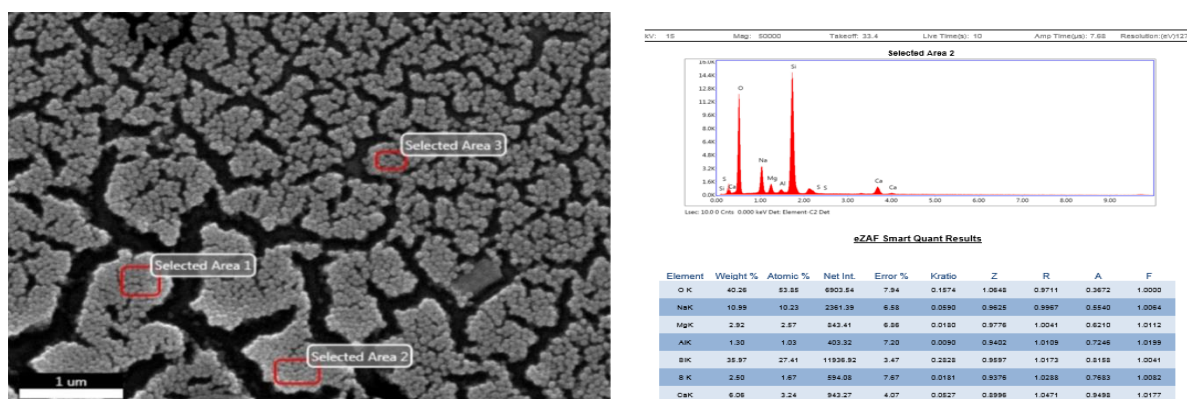

Supplementary Figure S2. EDS Analysis Results of Cys-graft-p(HEMA) nanopolymers

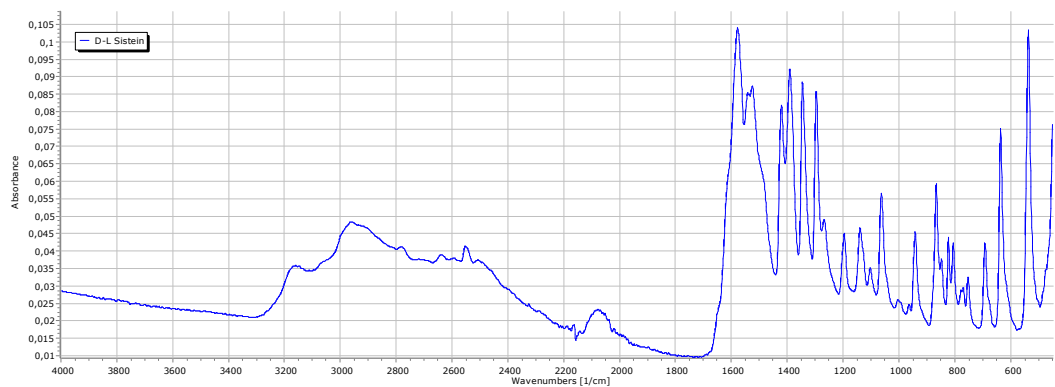

**Supplementary Figure S3. D-L Cysteine FTIR Spectrum**

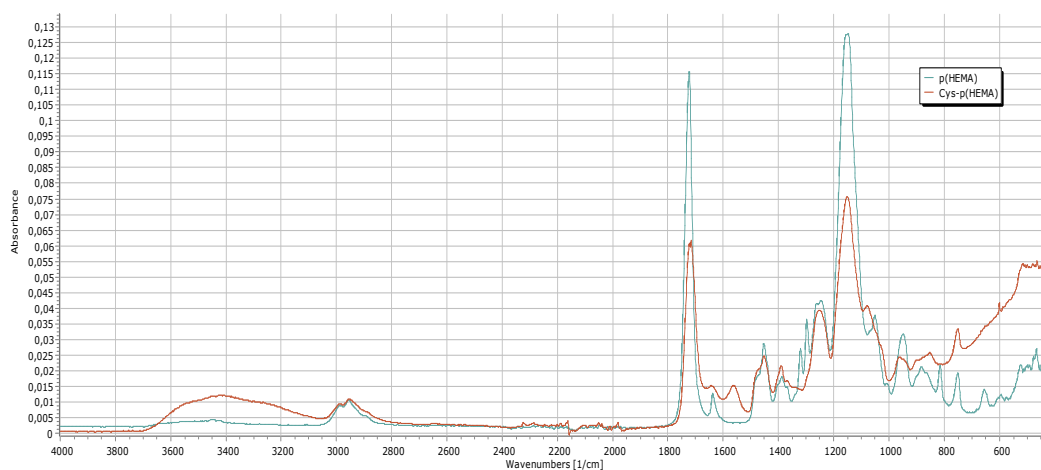

**Supplementary Figure S4. p(HEMA) ve Cys-graft-p(HEMA) FTIR Spectrum**

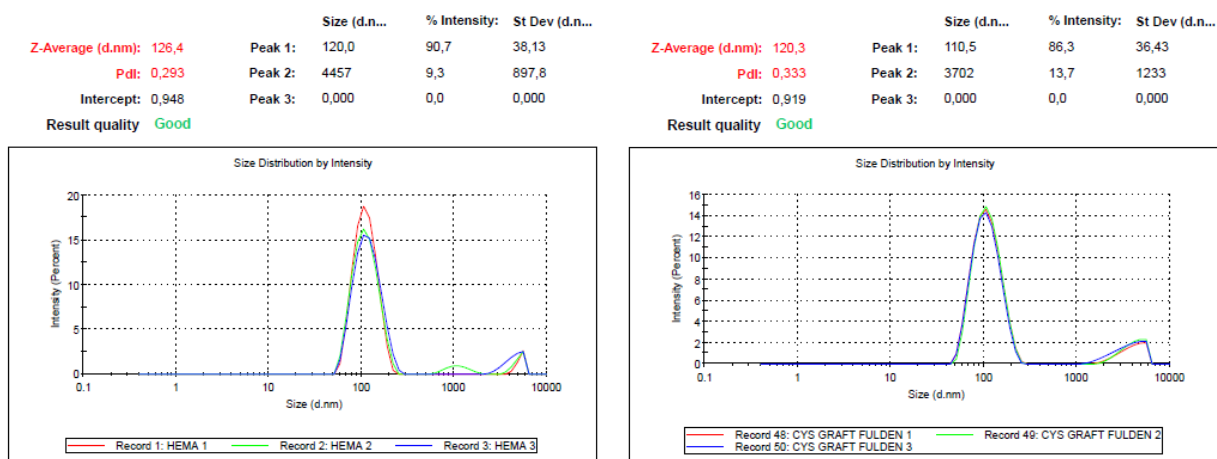

**Supplementary Figure S5. p(HEMA) and Cys-graft-p(HEMA) Zeta Size Graph**

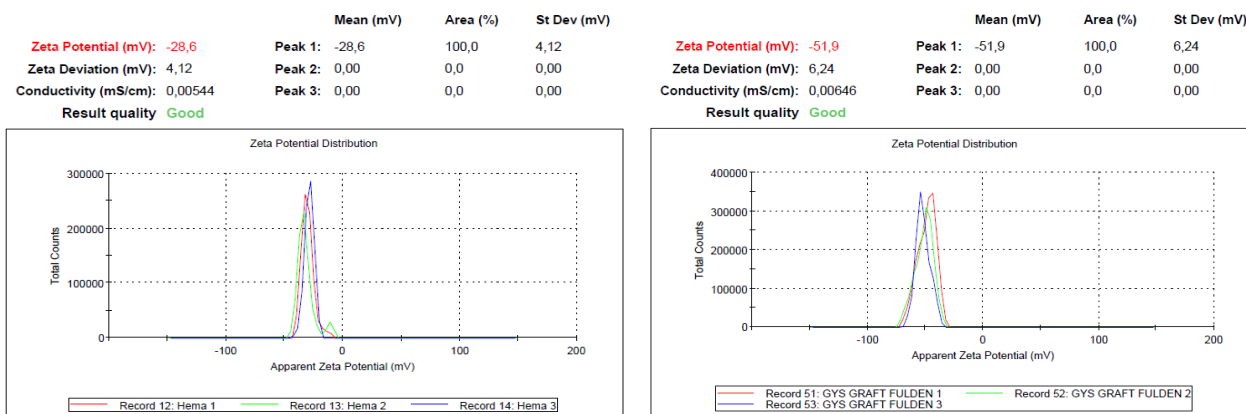

**Supplementary Figure S6.** p(HEMA) and Cys-graft-p(HEMA) Zeta Potential Graph

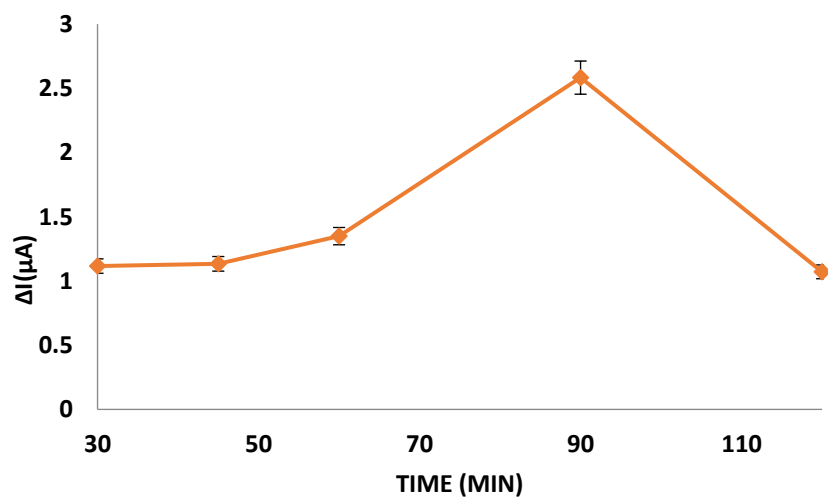

**Supplementary Figure S7.** Optimization of nanopolymer bonding time to gold electrode surface ( $V_{np}$ : 5 $\mu$ L)

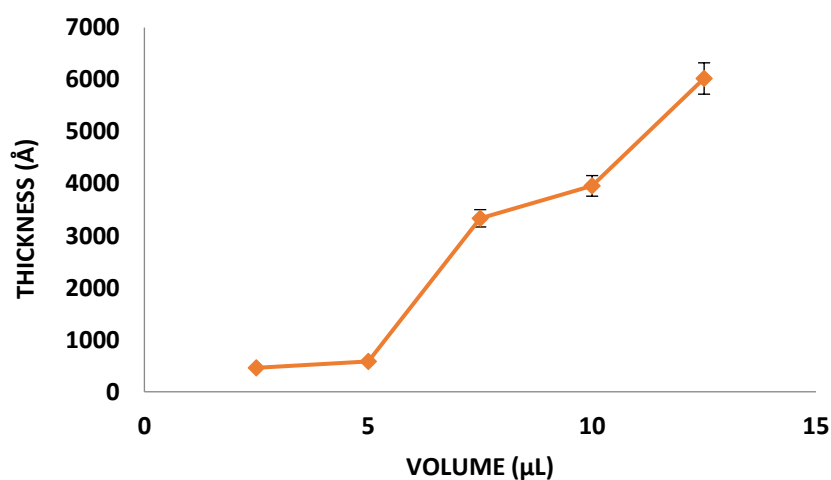

**Supplementary Figure S8.** Optimization of nanopolymer volume on gold electrode surface ( $t_{np}$ : 90min)

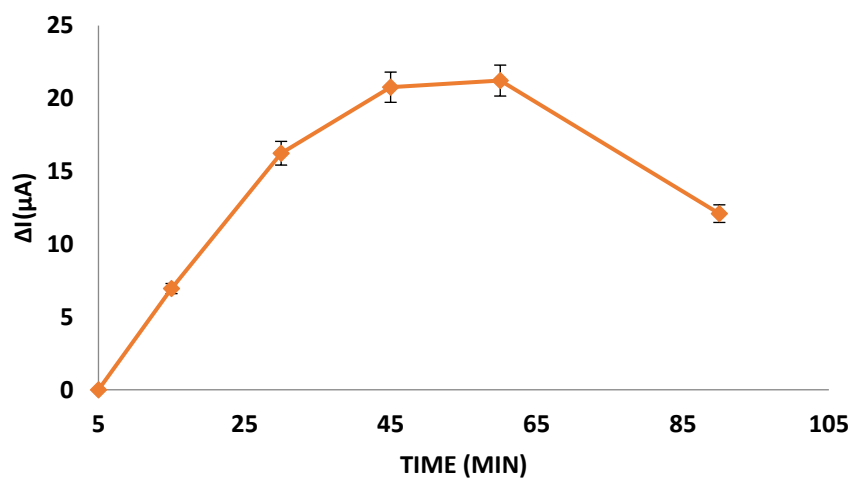

**Supplementary Figure S9.** Cys-graft p (HEMA) nanopolymer anti-miR-155 probe binding time optimization ( $V_{np}$ : 5  $\mu$ L,  $t_{np}$ : 90 min,  $C_{prob}$ : 5  $\mu$ M)

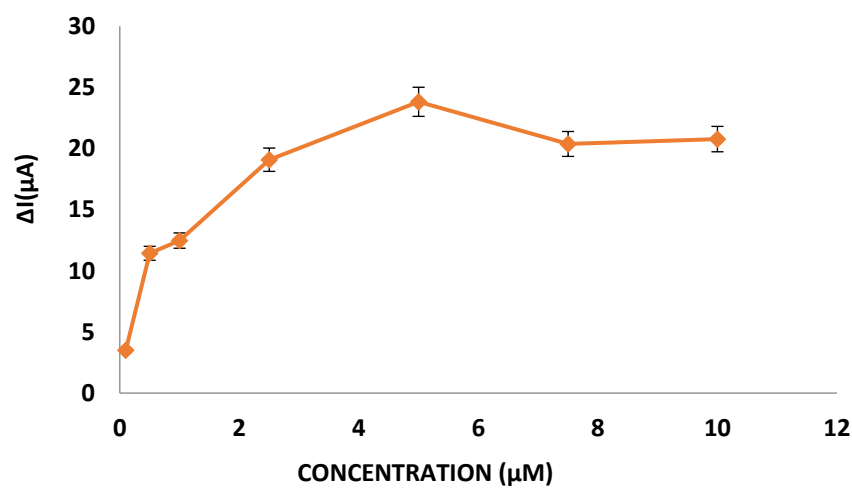

**Supplementary Figure S10.** Cys-graft p (HEMA) nanopolymer anti-miR-155 probe concentration optimization ( $V_{np}$ : 5  $\mu$ L,  $t_{np}$ : 90 min,  $t_{prob}$ : 45 min)

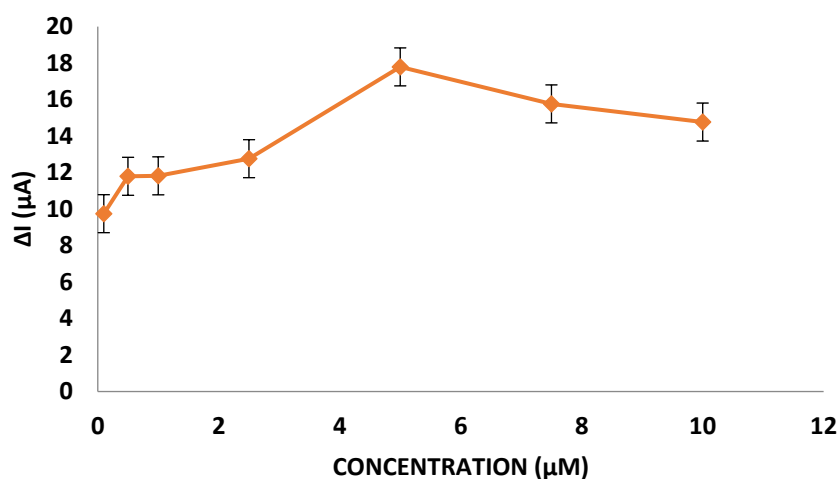

**Supplementary Figure S11.** Cys-graft p(HEMA) nanopolymer miR-155 binding optimization with different concentrations of anti-miR-155 probe ( $V_{np}$ : 5μL,  $t_{np}$ : 90 min,  $t_{prob}$ : 45min,  $C_{miR-155}$ : 5μM;  $t_{miR-155}$ : 30min)

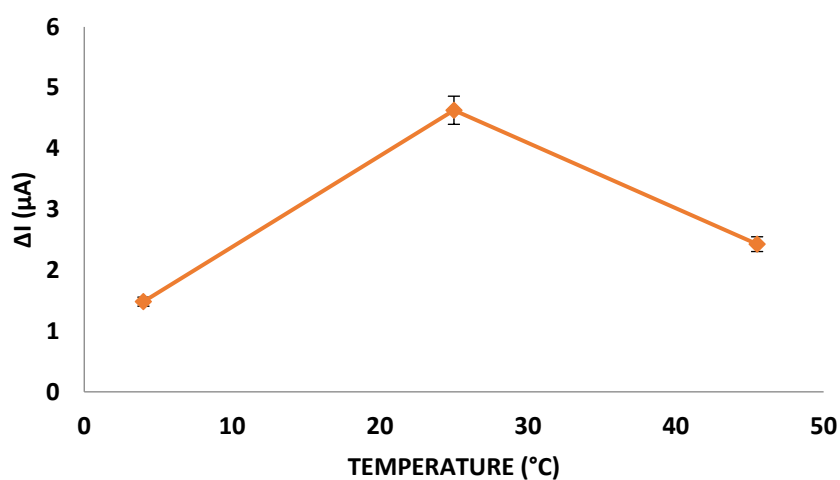

**Supplementary Figure S12.** Hybridization Temperature Optimization of Anti-miR-155 probe-bound Cys-graft p(HEMA) Nanopolymer and miR-155 Interaction ( $V_{np}$ : 5μL,  $t_{np}$ : 90 min,  $C_{prob}$ : 5μM,  $t_{prob}$ : 45 min,  $C_{miR-155}$ : 5μM,  $t_{miR-155}$ : 30min )

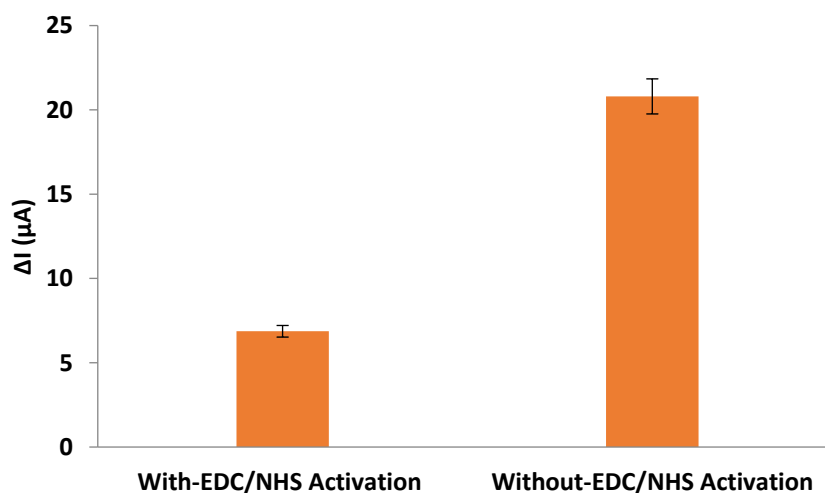

**Supplementary Figure S13.** Effect of EDC / NHS activation on probe binding on anti-miR-155 probe-bound Cys-graft p (HEMA) nanopolymer and miR-155 interaction ( $V_{np}$ : 5μL,  $t_{np}$ : 90 min,  $C_{prob}$ : 5μM,  $t_{prob}$ : 45 min,  $C_{miR-155}$ : 5μM,  $t_{miR-155}$ : 30min)

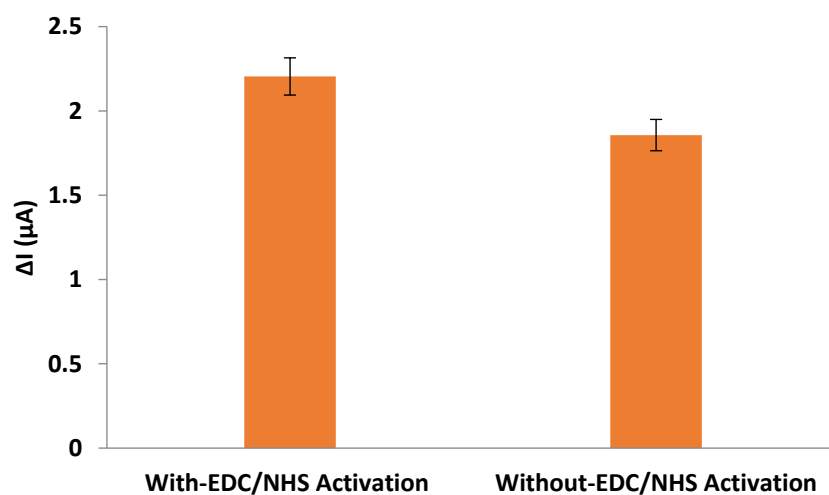

**Supplementary Figure S14.** Effect of EDC / NHS activation on miR-155 binding on anti-miR-155 probe-bound Cys-graft p (HEMA) nanopolymer and miR-155 interaction ( $V_{np}$ :  $5\mu L$ ,  $t_{np}$ : 90 min,  $C_{prob}$ :  $5\mu M$ ,  $t_{prob}$ : 45 min,  $C_{miR-155}$ :  $5\mu M$ ,  $t_{miR-155}$ : 30min)

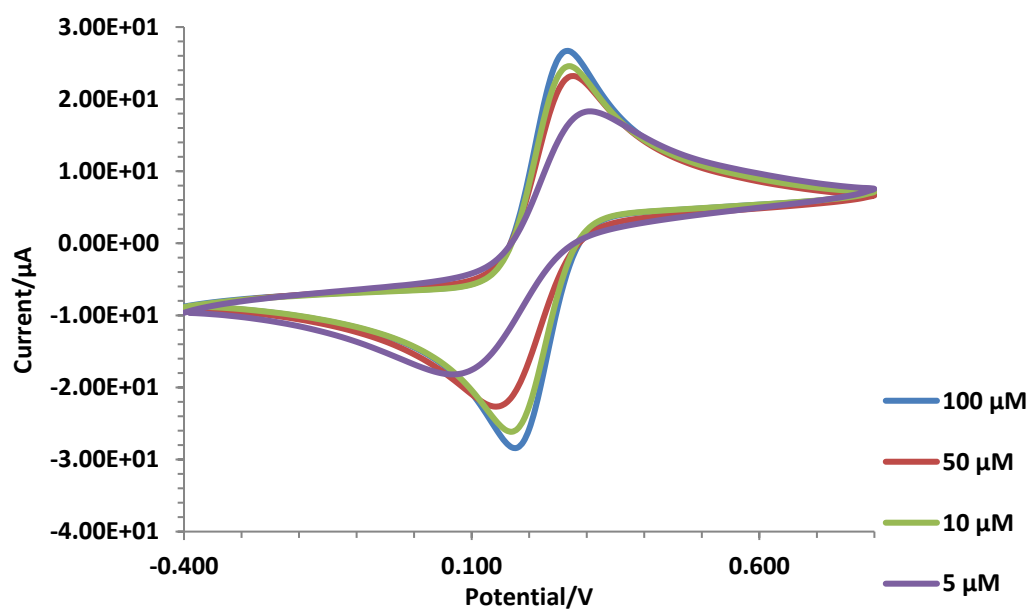

**Supplementary Fig 15.** CV analysis

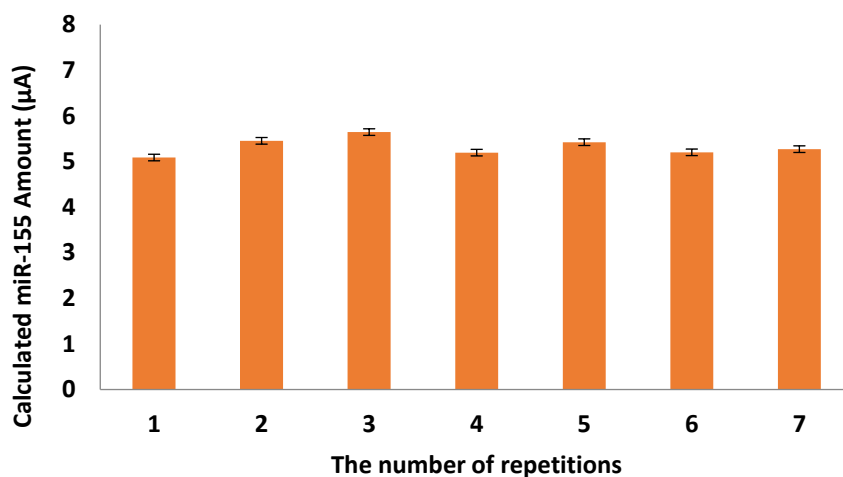

**Supplementary Figure S16.** anti-miR-155 probe-bound Cys-graft p(HEMA) nanopolymer miR-155 determination reproducibility graph ( $V_{np}$ : 5 $\mu$ L,  $t_{np}$ : 90 min,  $C_{prob}$ : 5 $\mu$ M,  $t_{prob}$ : 45 min,  $t_{miR-155}$ : 30 min, Number of repetitions: 7)

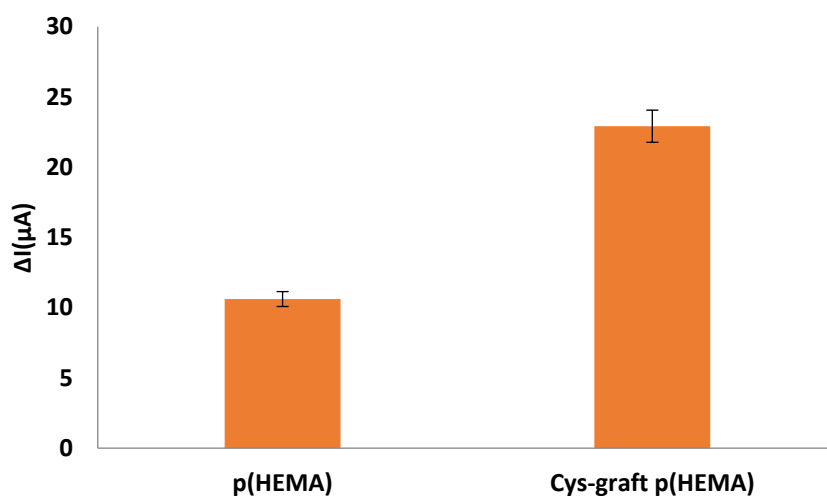

**Supplementary Figure S17.** Binding of anti-miR-155 on p(HEMA) and Cys-graft p(HEMA) nanopolymer ( $V_{np}$ : 5 $\mu$ L,  $t_{np}$ : 90 min,  $C_{prob}$ : 5 $\mu$ M,  $t_{prob}$ : 45 min)

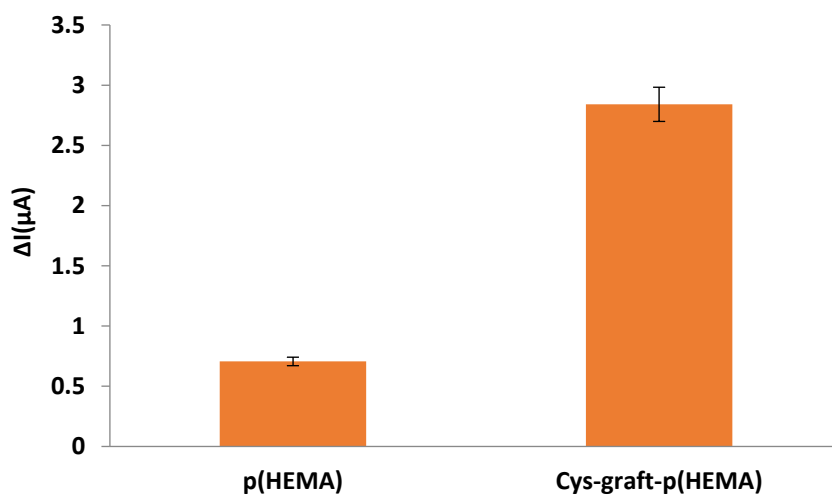

**Supplementary Figure S18.** miR-155 specificity of anti-miR-155 probe-bound p (HEMA) and Cys-graft p (HEMA) nanopolymer ( $V_{np}$ : 5 $\mu$ L,  $t_{np}$ : 90 min,  $C_{prob}$ : 5 $\mu$ M,  $t_{prob}$ : 45 min,  $C_{miR-155}$ : 5 $\mu$ M,  $t_{miR-155}$ : 30min)

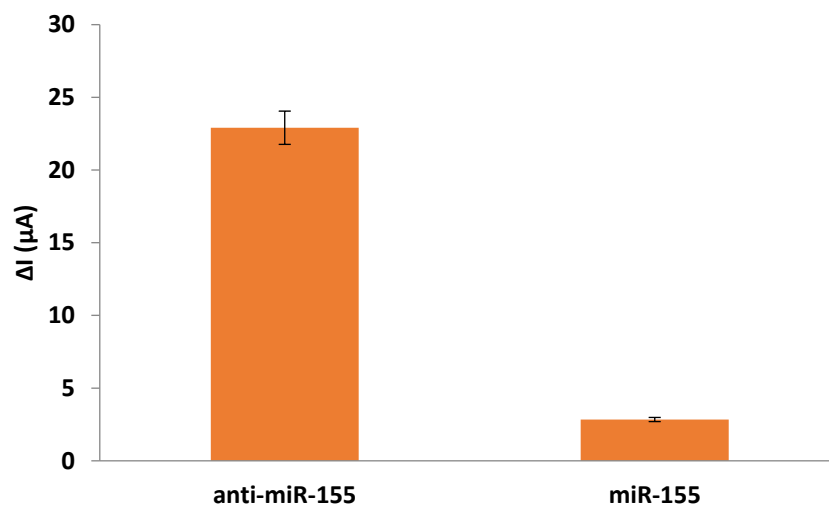

**Supplementary Figure S19.** Anti-miR-155 and miR-155 specificity of Cys-graft p (HEMA) nanopolymer ( $V_{np}$ : 5 $\mu$ L,  $t_{np}$ : 90 min,  $C_{prob}$ : 5 $\mu$ M,  $t_{prob}$ : 45 min,  $C_{miR-155}$ : 5 $\mu$ M,  $t_{miR-155}$ : 30min)

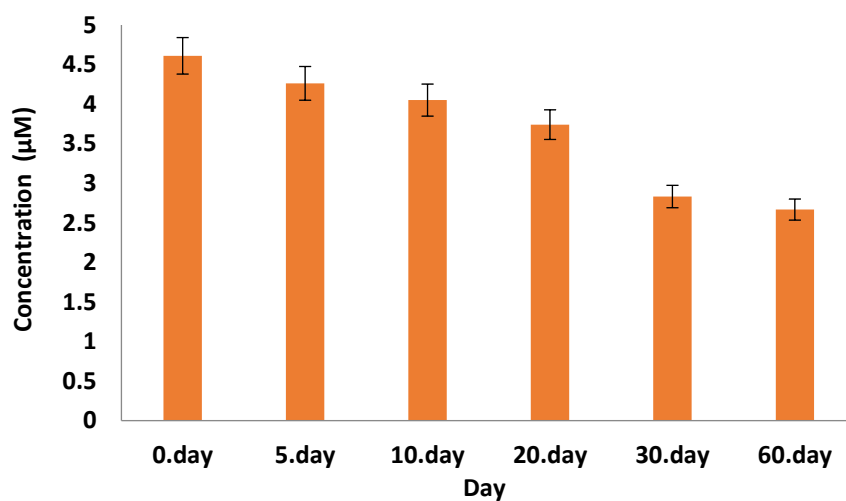

**Supplementary Figure S20.** Storage stability of the miR-155 diagnosis of anti-miR-155 probe-bound Cys-graft p (HEMA) nanopolymer ( $V_{np}$ : 5 $\mu$ L,  $t_{np}$ : 90 min,  $C_{prob}$ : 5 $\mu$ M,  $t_{prob}$ : 45 min,  $C_{miR-155}$ : 5 $\mu$ M,  $t_{miR-155}$ : 0, 5, 10, 20, 30, 60 days)



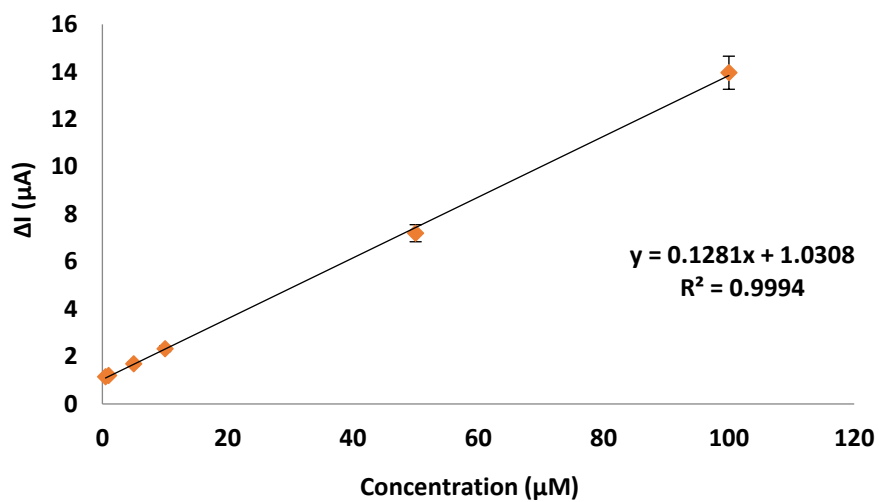

**Supplementary Figure S21.** miR-155 binding assay prepared in blood serum to anti-miR-155 probe-bound Cys-graft p(HEMA) nanopolymer ( $V_{np}$ : 5 $\mu L$ ,  $t_{np}$ : 90 min,  $C_{prob}$ : 5 $\mu M$ ,  $t_{prob}$ : 45 min,  $t_{miR-155}$ : 30min)

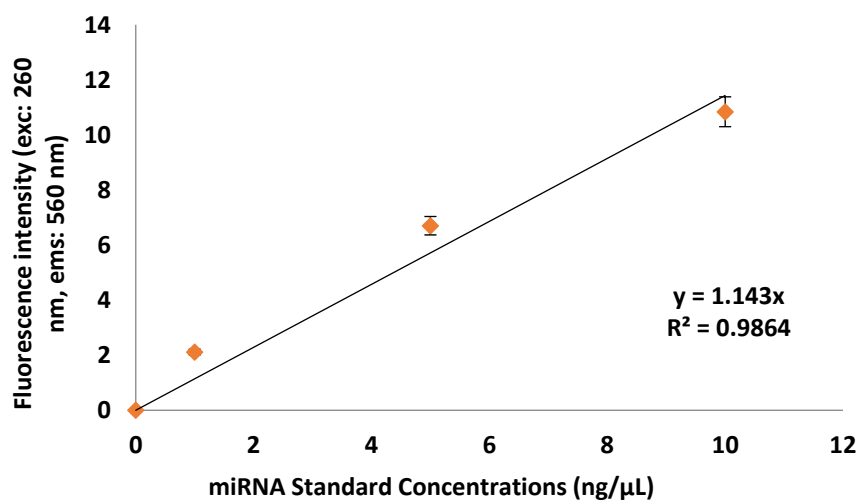

**Supplementary Figure S22.** Qbit miRNA Assay Calibration Chart
